# Supplementary material for: Persistent luminescence found in Mg2+ and Pr3+ co-doped LiNbO3 single crystal
Source: Royal Society of Chemistry journal article supplement (doi:10.1039/c8tc03783c), 2018-01-01
Supplement: c8tc03783c1.pdf [file c8tc03783c1.pdf]

## Supplementary Information

### **Persistent luminescence found in Mg<sup>2+</sup> and Pr<sup>3+</sup> co-doped**

### **LiNbO<sub>3</sub> single crystal**

Shaopeng Lin<sup>a</sup>, Chenwei Xiong<sup>a</sup>, Decai Ma<sup>a</sup>, Huashan Li<sup>a</sup>, Siwei Long<sup>\*b</sup> and Biao Wang<sup>\*a</sup>

*<sup>a</sup>Sino-French Institute of Nuclear Engineering and Technology, Sun Yat-sen University, Zhuhai, 519082,*

*China*

*<sup>b</sup>School of Physics, Sun Yat-sen University, Guangzhou 510275, China*

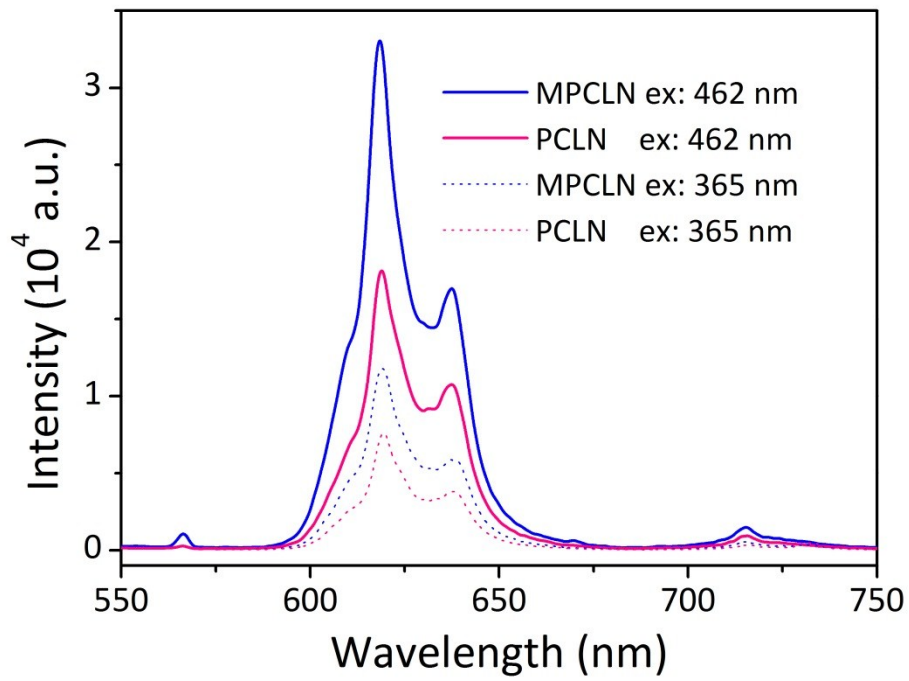

Fig. S1 Emission spectra of MPCLN and PCLN excited at 462 nm and 365 nm. All the emission peaks are at 619 nm, indicating that no shift at different excitation wavelength.

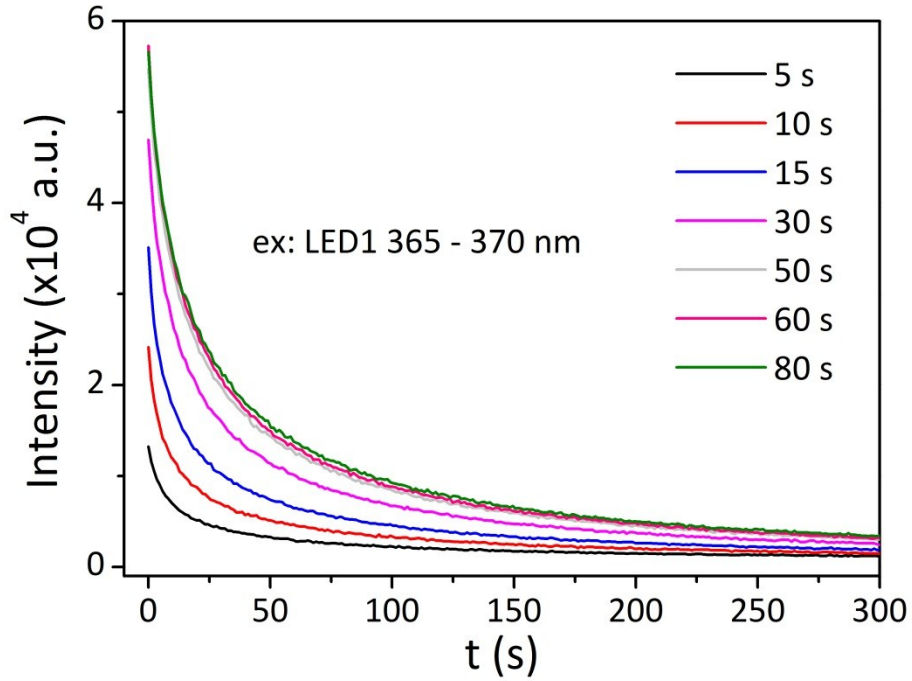

Fig. S2 Afterglow curves of MPCLN excited by LED1 (365 – 370 nm) with different excitation time from 5 to 80 seconds. It can be seen from the short time excitation results that the shallow level electron traps will be filled first and then the deeper ones with excitation time and saturation would be reached after 60 seconds.
